# Supplementary material for: Chondrogenic Differentiation of Pluripotent Stem Cells under Controllable Serum-Free Conditions
Source: MDPI journal article supplement (doi:10.3390/ijms20112711), 2019-06-02
Supplement: s1 [file s1]

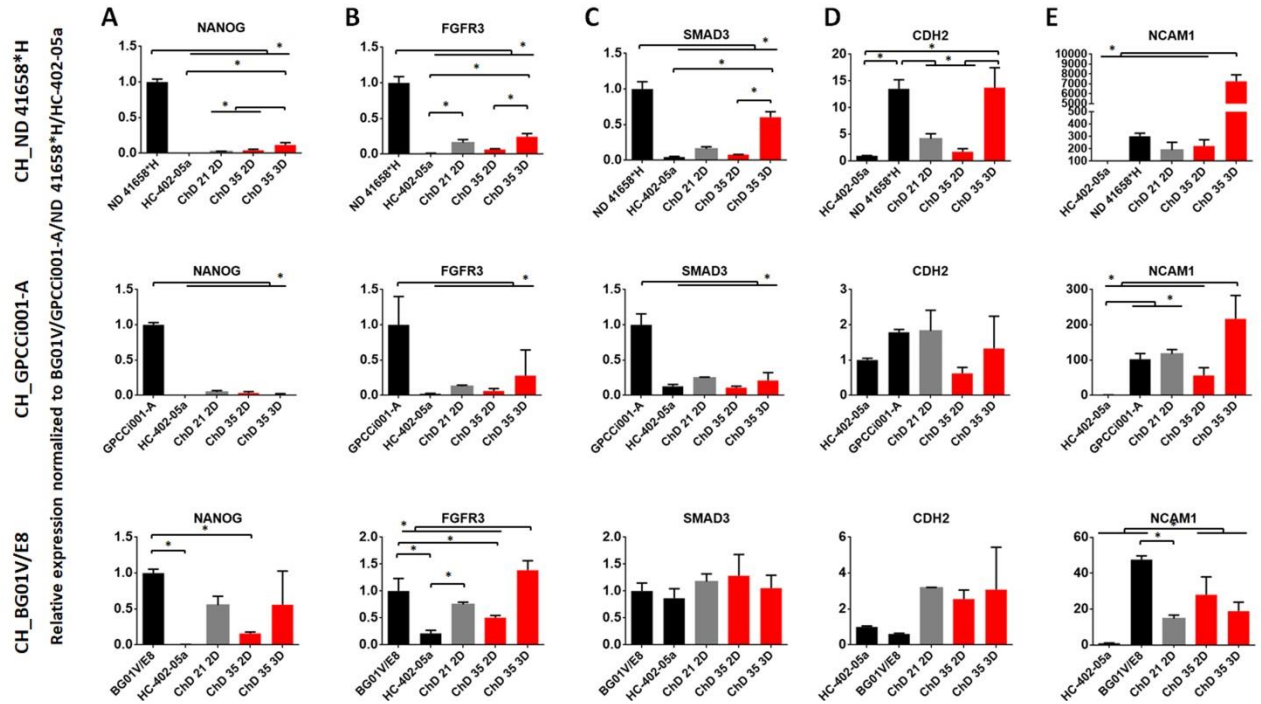

**Figure S1.** The effect of prolonged and 3D culture onto pluripotent (A), chondrogenic signalling pathways (B, C) and mesenchymal condensation (D, E) gene markers. RT-qPCR represents gene expression of markers specific to chondrogenesis during of chondrogenic differentiation. As a control the HC-402-05a was used and non-differentiated pluripotent stem cells. The error bars represent SD from three experiments. The statistical analysis was performed using ANOVA with Tukey's post-hoc multicomparison test (\* - p<0,05). ChD – Chondrogenic differentiation; 2D – two-dimensional culture; 3D – three-dimensional culture.

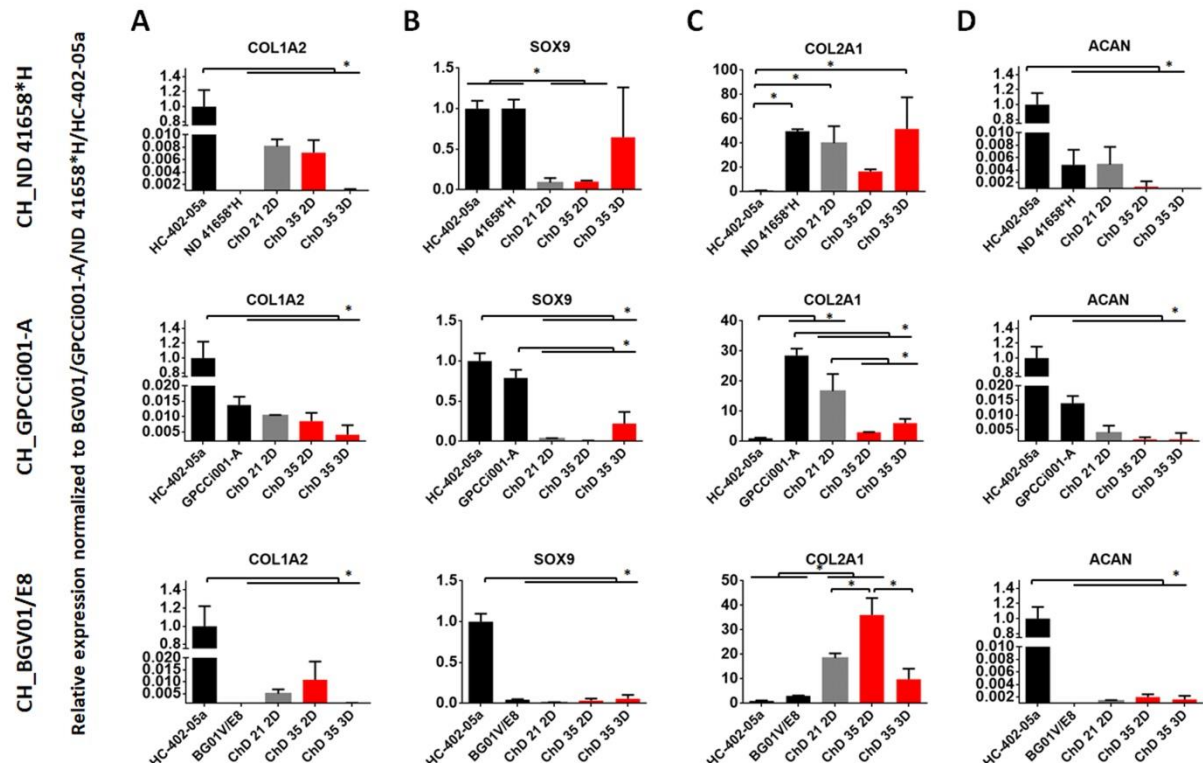

**Figure S2.** The effect of prolonged and 3D culture onto expression of chondrogenic markers. RT-qPCR represents gene expression of markers specific to chondrogenesis during chondrogenic differentiation (A, B, C & D). As a control the HC-402-05a was used and non-differentiated pluripotent stem cells. The error bars represent SD from three experiments. The statistical analysis was performed using ANOVA with Tukey's post-hoc multicomparison test (\* -  $p < 0,05$ ). ChD – Chondrogenic differentiation; 2D – two dimensional culture; 3D – three-dimensional culture.

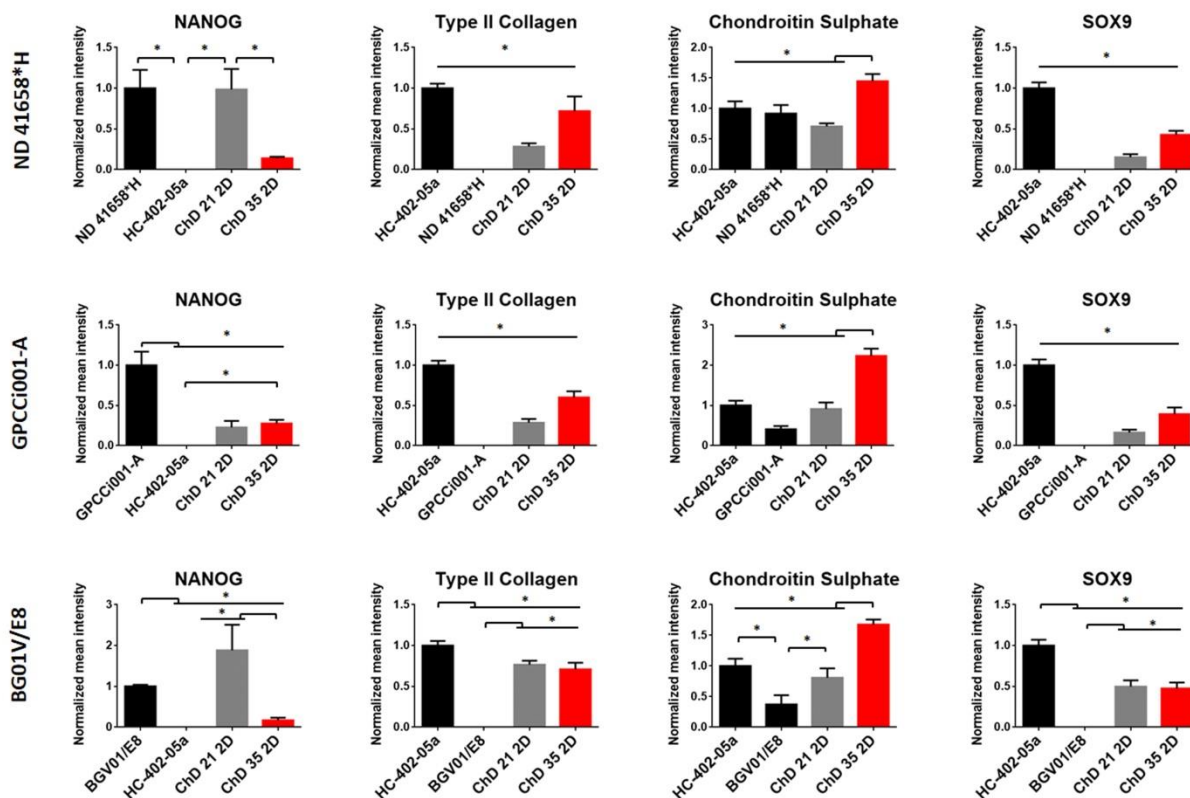

**Figure S3.** The semi-quantification of immunofluorescence staining for pluripotent and chondrogenic markers of differentiated and controls cell populations. Decreased mean intensity of NANOG and type II collagen and SOX9 of differentiated PSC populations was observed in comparison with controls. The chondroitin sulphate intensity was the highest at ChD 35 of PSC chondrogenic differentiation. As a control the HC-402-05a was used and non-differentiated pluripotent stem cells. The error bars represents SD from three experiments. The statistical analysis was performed using ANOVA with Tukey's post-hoc multicomparison test (\* -  $p < 0,05$ ). ChD – Chondrogenic differentiation; 2D – two dimensional culture; 3D – three-dimensional culture.

**Table S1.** List of primers

| Target mRNA | Forward Sequence        | Reverse Sequence      | Reference sequence | Probe no. |
|-------------|-------------------------|-----------------------|--------------------|-----------|
| ACAN        | cgatgaatcagaatcaactgctg | gtgtccctctgtctccttgc  | NM_013227.3        | 31        |
| CDH1        | aagttttccacaaagtcacg    | tgcttgattccagaaacg    | NM_004360.3        | 77        |
| CDH2        | atccgacgaatggtgaaag     | ctgtgggggtcattgtcagc  | NM_001792.3        | 45        |
| COL1A2      | ggcagtgatggaagtgtgg     | ccaacagctccaatttcacc  | NM_000089.3        | 45        |
| COL2A1      | ttctggagaccaaggtgctt    | ttcattagcaccatctttgc  | NM_001844.4        | 67        |
| FGFR3       | agaggccacacttcaagc      | cgacaggtccagggtactcgt | NM_000142.4        | 22        |

|              |                           |                       |             |    |
|--------------|---------------------------|-----------------------|-------------|----|
| <i>NANOG</i> | atgcctcacacggagactgt      | aagtgggtgtttgccttg    | NM_024865.2 | 31 |
| <i>NCAM1</i> | cgaccatccacctcaaagtc      | cggaggcttcacaggttaaga | NM_000615.6 | 68 |
| <i>OCT4</i>  | cttcggatttcgccttctc       | cttagccaggtccgaggat   | NM_002701.4 | 77 |
| <i>SMAD3</i> | caccacgcagaacgtcaa        | gatgggacacctgcaacc    | NM_005902.3 | 9  |
| <i>SOX2</i>  | tgcctctttaagactaggactgaga | gccgccgatgattgttatta  | NM_003106.3 | 45 |
| <i>SOX9</i>  | ctcgccacactcctctc         | cgcttcaggtcagccttg    | NM_000346.3 | 77 |

Aggrecan ACAN; E-cadherin – CDH1; N-cadherin – CDH2; Type 1 collagen - COL1A2; Type II collagen - COL2A1; Fibroblast Growth Factor Receptor 3 - FGFR3; Neural Cell Adhesion Molecule 1 - NCAM1; Octamer-binding transcription factor 4 – OCT4; SMAD Family Member 3 - SMAD3; SRY (sex determining region Y)-box 2 – SOX2; SRY (sex determining region Y)-box 9 - SOX9.

**Table S2. List of antibodies**

| <b>Primary antibodies</b>                              | <b>Host / Isotype</b> | <b>Vendor</b>                      | <b>Dilution</b> |
|--------------------------------------------------------|-----------------------|------------------------------------|-----------------|
| <b>NANOG</b>                                           | Mouse / IgG1          | BD Pharmigen, CA, USA              | 1:50            |
| <b>SOX9</b>                                            | Rabbit / IgG          | Merck-Millipore, Darmstadt Germany | 1:125           |
| <b>Type II collagen</b>                                | Rabbit / IgG          | Abcam, Cambridge, UK               | 1:100           |
| <b>Chondroitin Sulphate</b>                            | Mouse / IgM           | Abcam, Cambridge, UK               | 1:100           |
| <b>Secondary antibodies</b>                            | <b>Host / Isotype</b> | <b>Vendor</b>                      | <b>Dilution</b> |
| <b>Anti-Mouse IgG conjugated with Alexa Fluor 488</b>  | Donkey/ IgG           | Jackson ImmunoResearch, PA, USA    | 1:500           |
| <b>Anti-Rabbit IgG conjugated with Alexa Fluor 488</b> | Donkey/ IgG           | Jackson ImmunoResearch, PA, USA    | 1:500           |
| <b>Anti-Mouse IgM conjugated with Alexa Fluor 488</b>  | Donkey/ IgG           | Jackson ImmunoResearch, PA, USA    | 1:500           |
